# 1 Synchronous brain dynamics establish brief states of communality in 2 distant neuronal populations

3 Martin Seeber<sup>1</sup>, Christoph M. Michel<sup>1,2</sup>

4 <sup>1</sup>Functional Brain Mapping Lab, Department of Fundamental Neuroscience, Campus Biotech, University of  
5 Geneva, 1202 Geneva, Switzerland

6 <sup>2</sup>Center for Biomedical Imaging (CIBM), Lausanne and Geneva, 1015 Lausanne, Switzerland

7 Correspondence: [Martin.Seeber@unige.ch](mailto:Martin.Seeber@unige.ch), [Christoph.Michel@unige.ch](mailto:Christoph.Michel@unige.ch)

8 Postal address:

9 Martin Seeber  
10 H8.03 Groupe Michel  
11 Campus Biotech  
12 Chemin des Mines 9  
13 1202 Geneva  
14 Switzerland

15  
16 Abbreviated title: Synchronous brain dynamics establish brief states

17 Number of pages: 20

18 Number of figures: 6 main text

19 Number of words for abstract: 247, introduction: 632, and discussion: 1020

20 Declaration of Interests

21 The authors declare no competing interests.

22 Acknowledgements

23 This study was supported by the Swiss National Science Foundation (Grant Number: 320030\_184677)  
24 to C.M.M. The authors would like to thank Miralena I. Tomescu for her support in data preparation.

25 Author contributions

26 C.M.M and M.S. designed research, M.S. performed research, M.S. analyzed data, C.M.M. and M.S.  
27 wrote the paper

## 28 Abstract

29 Intrinsic brain dynamics co-fluctuate between distant regions in an organized manner during rest,  
30 establishing large-scale functional networks. We investigate these brain dynamics on a millisecond  
31 time scale by focusing on Electroencephalographic (EEG) source analyses. While synchrony is thought  
32 of as a neuronal mechanism grouping distant neuronal populations into assemblies, the relevance of  
33 simultaneous zero-lag synchronization between brain areas in humans remains largely unexplored.  
34 This negligence is due to the confound of volume conduction, leading inherently to temporal  
35 dependencies of source estimates derived from scalp EEG (and Magnetoencephalography, MEG),  
36 referred to as spatial leakage. Here, we focus on the analyses of simultaneous, i.e., quasi zero-lag  
37 related, synchronization that cannot be explained by spatial leakage phenomenon. In eighteen  
38 subjects during rest with eyes closed, we provide evidence that first, simultaneous synchronization is  
39 present between distant brain areas and second, that this long-range synchronization is occurring in  
40 brief epochs, i.e., 54-80 milliseconds. Simultaneous synchronization might signify the functional  
41 convergence of remote neuronal populations. Given the simultaneity of distant regions, these  
42 synchronization patterns might relate to the representation and maintenance, rather than processing  
43 of information. This long-range synchronization is briefly stable, not persistently, indicating flexible  
44 spatial reconfiguration pertaining to the establishment of particular, re-occurring states. Taken  
45 together, we suggest that the balance between temporal stability and spatial flexibility of long-range,  
46 simultaneous synchronization patterns is characteristic of the dynamic coordination of large-scale  
47 functional brain networks. As such, quasi zero-phase related EEG source fluctuations are  
48 physiologically meaningful if spatial leakage is considered appropriately.

## 49 Significance

50 Synchrony is suggested as a mechanism for coordinating distant neuronal populations. Yet,  
51 simultaneous (i.e., zero-lag) synchronization between remote brain regions in humans is difficult to  
52 demonstrate, because volume conduction in EEG/MEG recordings causes spurious zero-lag relations.  
53 Here, we investigate actual zero-lag relations and systematically compare them to the residual bias  
54 due to spatial smoothness of EEG source estimates. We indeed report simultaneous synchronization  
55 between distant brain regions. These synchronization patterns manifest variably in time. We suggest  
56 that simultaneous synchronization is relevant when studying the dynamic, large-scale functional  
57 architecture in humans.

## 58 Introduction

59 Brain activity spontaneously fluctuates during rest, when no specific task is instructed. Intriguingly,  
60 these fluctuations are correlated between distant brain regions, forming large-scale functional  
61 networks that are assumed to reflect spontaneous information integration during internal mentation  
62 (Raichle et al., 2001; Greicius et al., 2003; Smith et al., 2009; Brookes et al., 2011; Engel et al., 2013),  
63 i.e., the basis of thinking. While functional magnetic resonance imaging (fMRI) was crucial for the  
64 discovery and investigation of resting-state networks, the low time resolution of BOLD variations does  
65 not allow us to study the neurophysiological mechanisms leading to these spontaneous co-  
66 fluctuations of spatially distinct brain areas. Intracranial local field potential recordings or scalp  
67 electro-/magnetoencephalography (EEG/MEG) are adequate for this purpose, as they record neuronal  
68 activity at their inherent time-scale, i.e. in the millisecond range (Roelfsema et al., 1997; Miller et al.,  
69 2009; Baker et al., 2014; Fox et al., 2018; Vidaurre et al., 2018). Such studies revealed an essential key  
70 neuronal mechanism underlying information integration between different brain regions: Synchrony  
71 (Singer, 1999; Varela et al., 2001). Many studies have demonstrated that neuronal synchronization  
72 between brain areas is an important mechanism for the coordination of neuronal processing in  
73 anatomically distributed neuronal circuits (Engel et al., 1991; Contreras and Steriade, 1996; Roelfsema  
74 et al., 1997; Destexhe et al., 1999; Womelsdorf et al., 2007). A fundamental question is whether  
75 synchronous co-fluctuations between areas are simultaneous or time-lagged (Engel et al., 1991;  
76 Contreras and Steriade, 1996; Roelfsema et al., 1997; Destexhe et al., 1999; Fries, 2005; Womelsdorf  
77 et al., 2007; Siegel et al., 2008; Bosman et al., 2012; Van Kerkoerle et al., 2014). Because of delays due  
78 to axonal conduction and synaptic transmission, time-lagged fluctuations are necessarily appearing  
79 when the activation of one region is causally related to the activation of the other region, i.e. when  
80 one area transfers information to the other. Simultaneity, on the other hand, indicates a gathering of  
81 different brain areas converging into a functional unit to collectively maintain certain information  
82 without causal interactions between them. Such communality can be established spontaneously by  
83 dynamic recurrent connections or can be driven by a pacemaker (e.g., the thalamus) (Vicente et al.,  
84 2008; Gollo et al., 2014). Undoubtedly, both mechanisms (time-lagged and simultaneous fluctuations)  
85 take place in the brain to processes, integrate and maintain the information, as numerous intracranial  
86 recordings in animals and humans have shown (Contreras and Steriade, 1996; Roelfsema et al., 1997;  
87 Womelsdorf et al., 2007; Siegel et al., 2008; Hipp et al., 2011). Unfortunately, simultaneous activity,  
88 which imposes zero-lag related signals are primarily ignored in EEG/MEG network analyses to avoid  
89 spurious phase relations resulting from volume conduction (Nolte et al., 2004; Stam et al., 2007; Hipp  
90 et al., 2012; Marzetti et al., 2013; Colclough et al., 2015). EEG/MEG source reconstruction (Michel et  
91 al., 2004; Michel and Murray, 2012; He et al., 2018) is, to some extent, able to overturn volume

92 conduction effects. Yet, the limited spatial resolution of EEG/MEG source reconstruction techniques  
93 leads to spurious temporal relations (Palva et al., 2018; He et al., 2019). To correct for these spatial  
94 leakage effects, orthogonalization of source signals is a standard method. However, this method also  
95 discards genuine simultaneous dynamics and therefore is insensitive to detect such.

96 In this work, we aim to investigate simultaneous synchronization, i.e., quasi zero-lag relations between  
97 distant brain areas using high-density EEG source imaging (Michel et al., 2004; Michel and Murray,  
98 2012; He et al., 2018). To consider and correct for spatial leakage effects, we systematically compare  
99 actual with surrogate data having identical spatial properties in their source reconstruction.

100 In summary, we demonstrate that physiologically meaningful quasi zero-lag synchrony between  
101 distant brain areas exists that cannot be explained by spatial leakage phenomena. We suggest that  
102 brief epochs of simultaneous synchronization signify functional convergence of distant neuronal  
103 population dynamics into distinct re-occurring states.

## 104 **Methods**

### 105 *EEG recordings*

106 High-density EEG was recorded using an electrode net (Geodesic Sensor Net, Electrical Geodesics Inc.,  
107 Eugene, OR, USA) consisting of 256 electrodes that are interconnected by thin rubber bands. Each  
108 electrode includes a small sponge soaked with saline water to establish direct electrical contact with  
109 the participants' scalp. EEG was sampled at 1 kHz, referenced to the vertex.

110 Participants (N=18,  $30 \pm 5$  years, seven male) sat comfortably in an upright position in a darkened,  
111 electrically shielded room and were instructed to keep their eyes closed and relax for four to six ( $5.42$   
112  $\pm 0.95$ ) minutes avoiding drowsiness. The local ethical committee, following the declaration of  
113 Helsinki, approved the study. Participants provided written, informed consent for their participation.

### 114 *EEG preprocessing*

115 EEG recordings were band-pass filtered between 1-40 Hz offline, and electrodes covering cheeks and  
116 nape were excluded. Time epochs contaminated with apparent artifacts were marked and excluded  
117 from further analyses. Noisy or bad electrodes were excluded from Independent Component Analysis  
118 (ICA) (Jung et al., 2000), which was used to remove stereotypical artifact components containing  
119 saccades, eye blinks, and cardiac artifacts. Afterward, the initially excluded channels were spline  
120 interpolated in space, resulting in 204 channels. The recordings were re-referenced to the common  
121 average and down-sampled to 125 Hz for further analysis.

122

123 *EEG source imaging and functional network reconstruction*

124 We applied EEG source reconstruction using forward models based on realistic head geometry and  
125 conductivity data with consideration of skull thickness, i.e., Locally Spherical Model with Anatomical  
126 Constraints (LSMAC) (Brunet et al., 2011; Michel and Brunet, 2019). The grey matter was defined  
127 based on the MNI anatomical template model. The inverse solution space consisted of 5004 points  
128 equally distributed in this grey matter volume. The linear distributed inverse solution LAURA (Grave  
129 de Peralta Menendez et al., 2004) was used to calculate the current density distribution for each  
130 solution point at each moment in time. Dipole orientations were set to the first left singular vector of  
131 the xyz (3D) components in the resolution matrix of each source pointing outside of the brain to avoid  
132 sign ambiguities.

133 Functional networks were defined as spatial patterns co-varying with fluctuations in selected regions  
134 of interest (ROI) defined in an atlas parcellation (Schaefer et al., 2017). We chose the posterior  
135 cingulate cortex (PCC) and the supplementary motor area (SMA) as two exemplary seed regions based  
136 on previous literature focusing on functionally distinct key regions (Seeley et al., 2007; Raichle, 2010;  
137 Engel et al., 2013). The signal representing the activities in each ROI was defined as the first principal  
138 component of all dipoles within the given ROI (Rubega et al., 2018). Then, we calculated their signal  
139 envelope as the magnitude of the analytic signal using the Hilbert transform. To capture well-  
140 pronounced spatial patterns that include these key regions, we thresholded the signal envelope at the  
141 mean plus standard deviation following previous work (Tagliazucchi et al., 2012). The network  
142 patterns were then determined by sites that covary with this seed signal. To illustrate the resulting  
143 spatial patterns, they were spatially thresholded using watershed transform, and the local maxima  
144 positively co-varying with the respective ROI are shown (Fig. 1).

145 *Surrogate data and spatial leakage estimation*

146 To systematically assess the bias introduced by spatial leakage we used surrogate data, which we  
147 derived from the actual data. To do so, we temporally shifted the source reconstructed signals of the  
148 actual data randomly in time for every solution point individually for each subject. That way, the initial  
149 source dynamics of the surrogate data are the same as the actual source estimates, but the temporal  
150 relations between solution points are demolished. To introduce spatial leakage, we then applied the  
151 same forward model as used for analyzing actual data to generate surrogate EEG. Afterwards, we  
152 applied the identical processing pipeline to this surrogate data, i.e. filtering scalp data and source  
153 estimation using the same inversion kernel as in the analyses of the actual EEG data. Because we used  
154 identical forward model and inverse method for analyzing actual and surrogated data, the spatial  
155 properties of the source estimates are the same. That way, there are no actual correlations between

156 the sources given the introduced random time shifts. Therefore, the resulting inter-areal correlation  
157 values in the surrogate source estimates are due to spatial leakage between selected areas. This  
158 procedure provides bias estimates caused by spatial leakage for every connectivity metric, i.e.  
159 correlation, phase-locking value (PLV) and coherence for each individual subject. These bias estimates  
160 can be subtracted from the metrics of actual data as suggested previously (Ghuman et al., 2011; Palva  
161 and Palva, 2012) and used for statistical comparison.

### 162 *Synchrony between network nodes*

163 We investigated the correlation, lag, phase locking and coherence between network nodes. Between  
164 each pair, we determined the correlation for different lags of the signals using cross-correlation. To  
165 perform frequency-specific analyses, we applied wavelet transform (Morlet et al., 1982) for time-  
166 frequency (TF) decomposition (1–40 Hz, 1 Hz steps). Parameters for the mother wavelet were set to  
167 the full width at half maximum of three seconds for the Gaussian kernel at a center frequency of 1 Hz.  
168 PLV and coherence was computed for every frequency bin and are reported as magnitudes herein and  
169 for the latter as real and imaginary part of the coherency (Lachaux et al., 1999; Lachaux et al., 2002)  
170 to compare with previous literature (Nolte et al., 2004). Simultaneous synchrony is indicated as peak  
171 correlation at zero-lag in the cross-correlogram and the real part of coherency. The time-varying phase  
172 in each ROI was computed using Hilbert transform in order to determine phase differences between  
173 regions for every time point. The distribution of these phase differences were illustrated as polar  
174 histograms. The cosine of these phase differences  $\Delta\phi$  was used as instantaneous measure of  
175 simultaneous synchronization, which is 1 for zero phase difference (Deco and Kringelbach, 2016;  
176 Cabral et al., 2017). The duration of phase synchrony, which is centered around zero phase lag was  
177 determined by epochs of  $\cos(\Delta\phi)$  exceeding 0.5. Very short epochs smaller than 24ms, i.e. 3 time  
178 samples, were not considered as stable and therefore ignored for computing the average duration. All  
179 metrics were statistically compared to results derived from surrogate data. Paired comparisons were  
180 carried out using the Wilcoxon signed-rank test, which were Bonferroni corrected for multiple  
181 comparisons.

## 182 **Results**

### 183 *Large-scale brain dynamics form briefly stable functional networks*

184 We found bilateral, symmetric posterior regions in the extrastriate cortex and inferior parietal lobe  
185 (IPL) to co-vary with the PCC's source signal. In contrast, we found anterior areas of the bilateral  
186 prefrontal cortex and the thalamus to co-vary with the SMA (Fig. 1a-b). To rule out a potential source  
187 imaging bias that might cause these patterns, we performed the same analyses on the surrogate data.  
188 Importantly, we found no distant spatial local maxima forming a network pattern in the surrogate

189 data. Merely the respectively selected regions were present, meaning we did not observe co-varying  
190 regions using surrogate data (Fig. 6).

191 The phase relations between nodes of these functional network patterns in the real data vary  
192 considerably in time. We observe epochs in which the phase differences remain small, meaning these  
193 two nodes fluctuate synchronously at these time points (Fig. 1c-d). The durations of these epochs are  
194 in the range between 54.1 and 79.1 milliseconds on average depending on the constellation. The  
195 durations of all pairs belonging to the same functional network are significantly longer than respective  
196 periods computed from surrogate data. The detailed duration of each pair and their respective p-  
197 values are listed in Table 1.

### 198 *Simultaneous synchronization is present between distant neuronal populations*

199 We identified functional network patterns that are composed of distinct nodes that are symmetric in  
200 both hemispheres (Fig. 1). This finding already indicates that these distant regions co-vary on a highly  
201 resolved time scale. To directly test if the correlation between these nodes is significantly larger than  
202 the spatial leakage bias, we focused on the analyses of pairwise nodes for each network pattern. To  
203 provide more detail about these interactions, we investigated different time lags and frequency  
204 components. For the PCC based network, we focused on posterior bilateral IPL regions. The cross-  
205 correlation between pairs of these network nodes peaks at zero-lag with values ranging between 0.1  
206 and 0.28, which is significantly higher than the spatial leakage bias observed in the surrogate data.  
207 The detailed values are listed in Table1. Interestingly, the interhemispheric zero-lag correlation was  
208 highest in this posterior network. The frequency-specific PLV reached its maximum for this pair at  
209 11Hz with a value of 0.34. In this case, the real part of the coherency is considerably higher than its  
210 imaginary part (Fig.2).

211 For the SMA based network, we further examined the relation of the SMA to regions in the bilateral  
212 PFC and to the thalamus. The cross-correlation between these regions peaks at zero-lag with a value  
213 of ranging between 0.24 and 0.32, which is significantly higher than the spatial leakage bias observed  
214 in the surrogate data. The frequency-specific PLV reached its maximum at 10Hz with a value of 0.42  
215 for the interhemispheric PFC connection. Again, the real part of the coherency is higher than its  
216 imaginary part (Fig.3). These results show that actual zero-phase relations, indicating simultaneous  
217 synchronization, are present between relatively distant regions.

218 For direct visual comparison of actual with surrogate data we also show the uncorrected metrics  
219 overlaid with the bias estimates in Fig.4 and Fig.5. These bias estimates are the higher, the closer a  
220 node pair is, but also the lower the spatial resolution between these areas is. For example, the zero-

221 lag correlation peak of the surrogate data is higher for the intrahemispheric pairs (Fig.4b, top and  
222 bottom row), than the bias of the more distant interhemispheric pair (Fig.4b middle row). This is  
223 analogously the case for the PLV relations in Fig.4c. The same applies for comparing the top three rows  
224 in Fig.5c-d for the SMA based network. The bias due to spatial leakage is maximal between SMA and  
225 the thalamus, which is plausible given the low spatial resolution in subcortical areas (Fig.5, bottom  
226 row). In addition, spatial leakage is biasing the phase distribution of the surrogate data towards zero,  
227 i.e. right in the plots of Fig.4d and Fig.5d. In other terms, the phase distribution is not circular any  
228 more, but biased due to spatial leakage, which is best visible in Fig.5d, bottom row (displayed in red).  
229 Yet, for the actual recordings, the phase bin centered around zero exceeds this bias significantly  
230 (displayed in blue).

231

|                      | r    | p <sub>r</sub> | PLV  | p <sub>PLV</sub> | Dur [ms] | p <sub>Dur</sub> |
|----------------------|------|----------------|------|------------------|----------|------------------|
| left IPL - PCC       | 0.20 | 0.0038         | 0.22 | 0.0011           | 69.9     | 0.0007           |
| left IPL - right IPL | 0.28 | 0.0007         | 0.28 | 0.0007           | 79.1     | 0.0007           |
| right IPL - PCC      | 0.10 | 0.0123         | 0.15 | 0.0007           | 66.2     | 0.0024           |
| left PFC- SMA        | 0.24 | 0.0012         | 0.34 | 0.0007           | 57.1     | 0.0038           |
| left PFC - right PFC | 0.31 | 0.0007         | 0.37 | 0.0007           | 54.1     | 0.0020           |
| right PFC – SMA      | 0.26 | 0.0012         | 0.34 | 0.0007           | 61.9     | 0.0009           |
| SMA – thalamus       | 0.32 | 0.0020         | 0.34 | 0.0012           | 75.8     | 0.0011           |

232 Table 1. Correlation, PLV in the alpha range (8-12 Hz) and duration of each pair with respective p-  
233 values (Wilcoxon sign rank test, Bonferroni corrected)

234



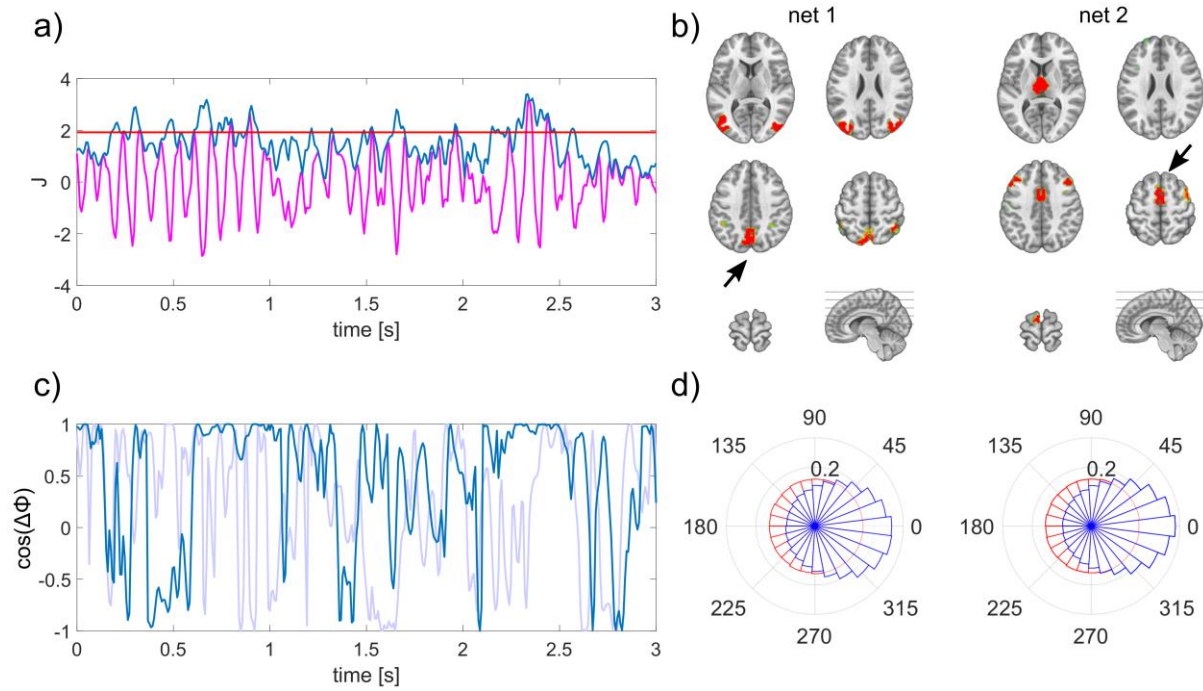

235

236 Figure 1. Derivation and characterization of EEG source reconstructed networks. a) The envelope  
237 (blue) of source estimated activity (magenta) is thresholded to define periods of well-pronounced  
238 activity within a specific region of interest (here PCC). b) Nodes of the network co-varying with the  
239 PCC (net 1) during periods defined as indicated in a) and with the SMA (net 2) as region of interest  
240 marked with black arrows. c) Exemplary time course of instantaneous phase locking between lateral  
241 posterior regions of net 1, matching the time period shown in a) in magenta; surrogate phase locking  
242 is shown in light blue. d) Polar histograms of the group, displaying the distribution of interhemispheric  
243 phase differences between lateral posterior (net 1) and anterior (net 2) regions as illustrated in b) in  
244 blue; surrogate phase differences in red. The radius for each phase bin displays the probability density  
245 function estimate of the respective phase differences.

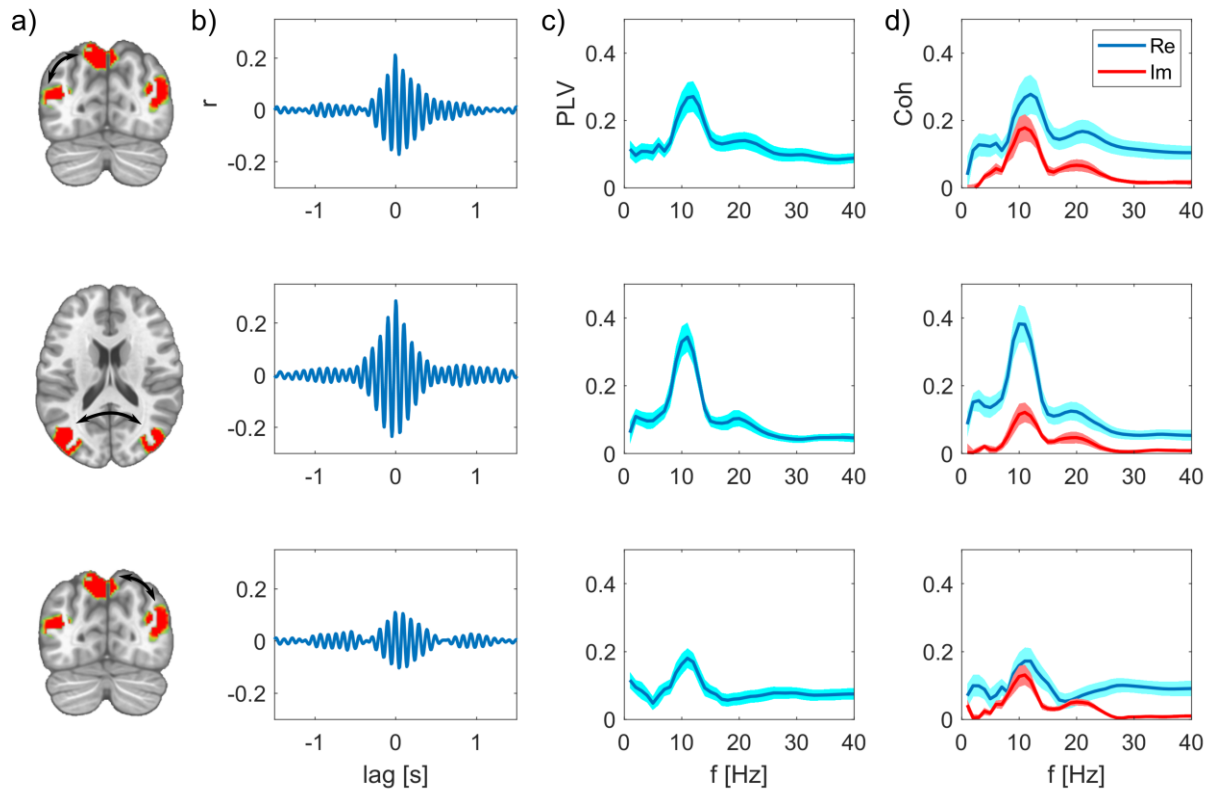

246

247 Figure 2. Synchrony between the nodes of the PPC network after subtracting spatial leakage bias. a)  
248 Nodes of the network, edges are indicated as arrows. b) Cross-correlations between these two nodes  
249 are respectively maximal at zero lag. c) PLV as function of frequency, group mean  $\pm$  SEM. d) Real and  
250 imaginary part of the coherency, group mean  $\pm$  SEM.

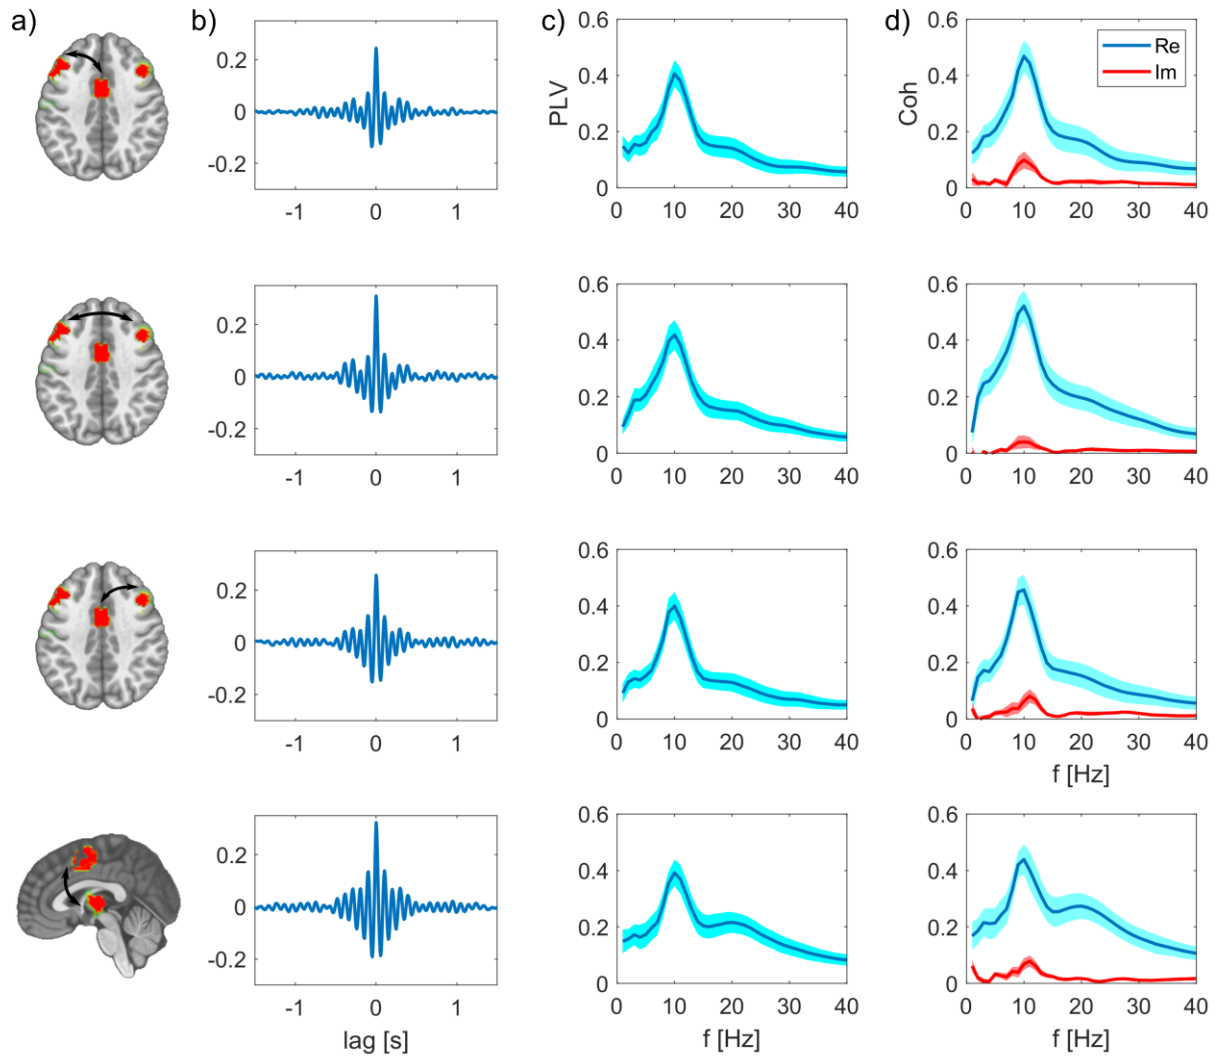

251

252 Figure 3. Synchrony between the nodes of the SMA network after subtracting spatial leakage bias. a)  
253 Nodes of the network, edges are indicated as arrows. b) Cross-correlations between these two nodes  
254 are respectively maximal at zero lag. c) PLV as function of frequency, group mean  $\pm$  SEM. d) Real and  
255 imaginary part of the coherency, group mean  $\pm$  SEM.

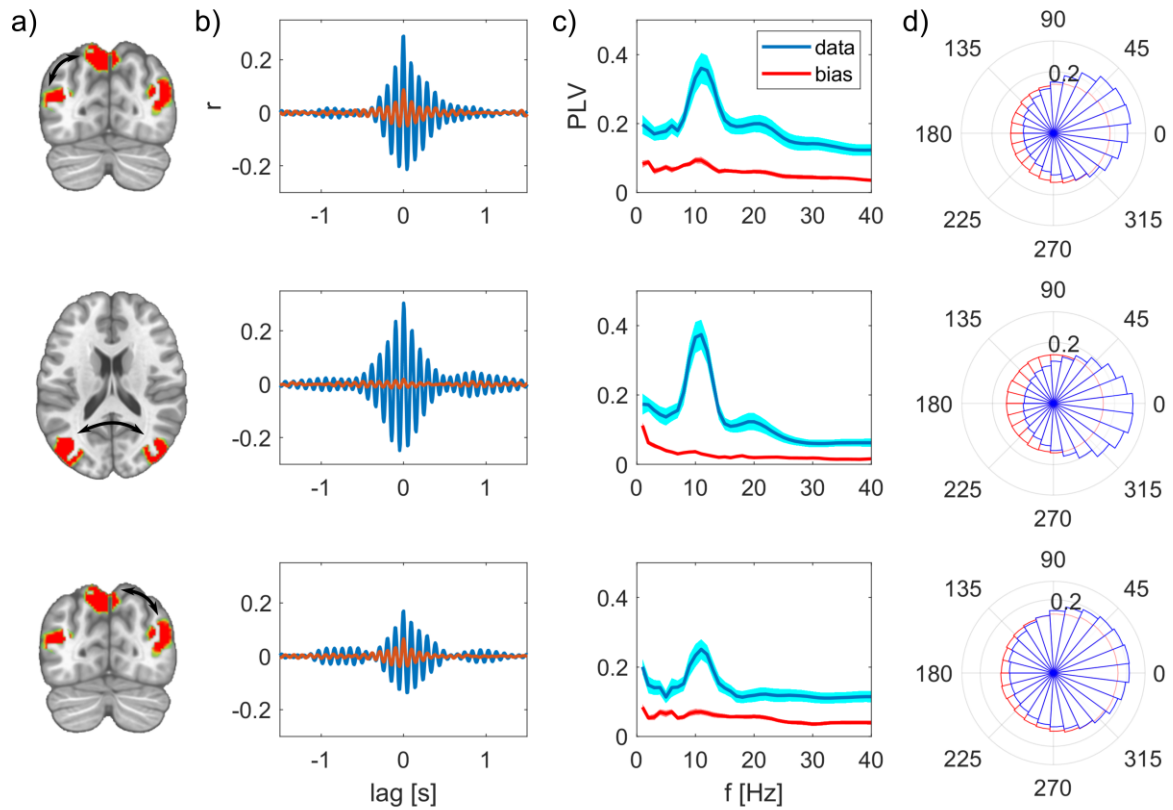

256

257 Figure 4. Synchrony between the nodes of the PPC network, uncorrected measures in comparison to  
258 spatial leakage bias. a) Nodes of the network, edges are indicated as arrows. b) Cross-correlation  
259 between these two nodes, actual (uncorrected) data is shown in magenta, bias in surrogate data in  
260 red. c) PLV as function of frequency, group mean  $\pm$  SEM. d) Polar histograms showing the distribution  
261 of phase differences for actual data in blue and surrogate data in red. The radius for each phase bin  
262 displays the probability density function estimate of the respective phase differences.

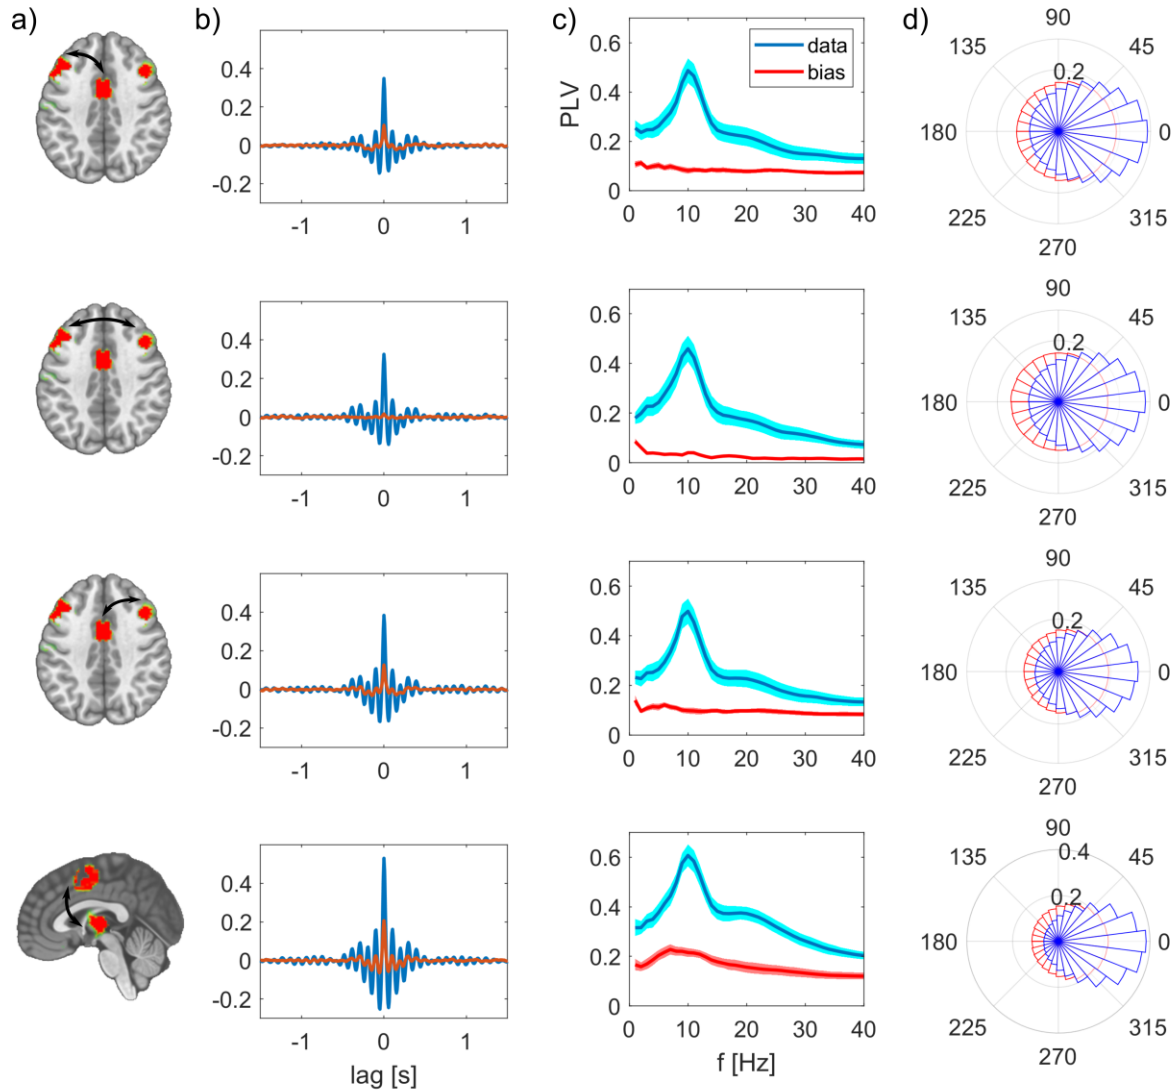

263

264 Figure 5. Synchrony between the nodes of the SMA network, uncorrected measures in comparison to  
265 spatial leakage bias. a) Nodes of the network, edges are indicated as arrows. b) Cross-correlation  
266 between these two nodes, actual (uncorrected) data is shown in magenta, bias in surrogate data in  
267 red. c) PLV as function of frequency, group mean  $\pm$  SEM. d) Polar histograms showing the distribution  
268 of phase differences for actual data in blue and surrogate data in red. For every constellation in this  
269 network, the most frequent phase difference is zero. The radius for each phase bin displays the  
270 probability density function estimate of the respective phase differences.

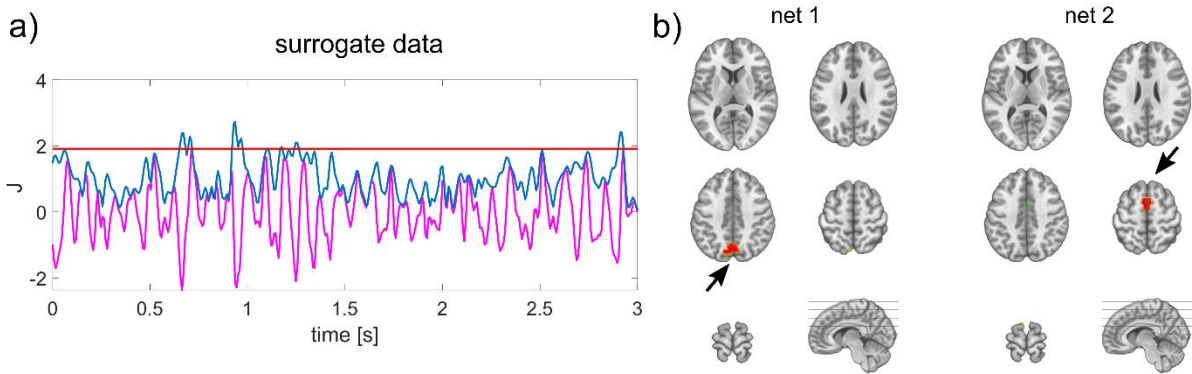

271

272 Figure 6. Absence of distant co-varying sites in surrogate data. a) The envelope (blue) of source  
273 estimated surrogate data (magenta) is thresholded to define periods of well-pronounced activity  
274 within a specific region of interest (here PCC). b) No distant local maxima were identified co-varying  
275 with the PCC (net 1), or with the SMA (net 2) marked with black arrows.

## 276 Discussion

277 In this work, we investigate synchronous EEG source dynamics between distant brain regions. The  
278 functional network patterns we reconstruct revealed spatially well-separated remote brain regions.  
279 Investigating the temporally highly resolved phase relations indicating long-range synchronization, we  
280 actually observe quasi zero-lag related fluctuations between these distant regions. By comparing  
281 these results systematically to surrogate data with identical spatial properties in their source  
282 reconstruction, we demonstrate that the observed effects cannot be explained by spatial leakage  
283 phenomena.

### 284 *Large-scale brain dynamics form briefly stable functional networks*

285 In the reconstruction of functional network patterns, we focused on two key brain regions, i.e., the  
286 PCC and SMA. The PCC based network is composed of bilateral posterior areas of the extrastriate  
287 cortex and inferior parietal lobes. This network resembles the posterior subdivision of the default  
288 mode network that was previously reported using MEG recordings (Hipp et al., 2012; Vidaurre et al.,  
289 2018). The SMA based network is composed of the bilateral prefrontal cortex and the thalamus, which  
290 are regions associated with the anterior part of the control network (Seeley et al., 2007; Raichle, 2010).  
291 We included analyses of thalamic signals because recent work (Krishnaswamy et al., 2017; Seeber et  
292 al., 2019) demonstrated the detectability of subcortical activities using EEG source imaging.

293 However, we did not find a one to one correspondence between the network patterns we observed  
294 herein and the M/EEG amplitude correlation-based networks (Brookes et al., 2011; Samogin et al.,  
295 2019) that were related to the well-known fMRI resting-state networks (Smith et al., 2009; Raichle,  
296 2010). This discrepancy might stem from the different time-scale of co-variation, i.e., the temporal  
297 precision, and coupling measure, which define these functional networks. In this work, phase relations  
298 are relevant, since we were aiming for high temporal precision reflecting long-range synchrony. In  
299 contrast, in fMRI and M/EEG amplitude envelope-based analyses, the temporal alignment on a second  
300 scale is sufficient for capturing correlated activities. Phase coherence and amplitude envelop  
301 correlation are two types of coupling measures suggested to reflect distinct mechanisms related to  
302 different functions (Engel et al., 2013).

303 We report the nodes of these network patterns synchronizing in brief time intervals, typically in the  
304 range of 54 and 80 milliseconds. These briefly stable epochs and their duration are in good agreement  
305 with previously reported time epochs for the EEG microstates (Michel and Koenig, 2018) and transient  
306 states derived from MEG recordings using Hidden Markov Models (HMM) (Vidaurre et al., 2018).  
307 However, the HMM states are derived from orthogonalized signals (Colclough et al., 2015) that  
308 discards zero-phase relations. EEG microstates are defined as stable topographies. If a particular

309 source network configuration maintains quasi-zero phase relations for a certain period, that  
310 necessarily leads to a stable topography of the scalp potential field. Therefore, the brief manifestation  
311 of specific quasi zero-lag related network patterns we describe in this work can be seen as the  
312 underlying source dynamics of the microstates.

313 The temporal dynamics of these briefly stable epochs are characteristic for metastability, i.e., signified  
314 by a counterbalance between integrated, i.e. synchronous, and segregated epochs (Tognoli and Kelso,  
315 2014; Deco et al., 2015). In terms of large-scale brain dynamics that means specific nodes of a network  
316 pattern are converging into synchrony, i.e. quasi zero-lag relationships, for brief epochs. These  
317 integrated, highly synchronous states fall abruptly apart, i.e. segregate, before the next integrated  
318 state is established. In that way, it is possible to develop dynamic representations flexibly since distinct  
319 states can be installed in different spatial configurations (Tononi and Edelman, 1998; Deco and  
320 Kringelbach, 2016; Ju and Bassett, 2020).

### 321 *Simultaneous synchronization is present between distant neuronal populations*

322 The fact that we observe spatially well-separated, co-varying sites as network patterns is the first  
323 indicator that these distant regions are functionally related at a millisecond time scale. These distant  
324 sites are absent when repeating these analyses with surrogate data (Fig.6). In addition to this spatial  
325 assessment, the functional results, e.g. PLVs, we describe herein significantly exceed the bias due to  
326 spatial leakage, which we derive from surrogate data. As expected, these bias estimates are the  
327 higher, the closer two areas are and the lower the spatial resolution at these sites is. Surprisingly, we  
328 found the interhemispheric interactions to be higher than the intrahemispheric interactions. Because  
329 the distance between respective regions is larger for the interhemispheric than the intrahemispheric  
330 pairs, this result cannot be an effect of spatial leakage. These findings together with the cross-  
331 correlation peak at zero lag signify genuine simultaneous synchronization between these distant  
332 regions.

333 The finding of long-range, simultaneous synchronization is in line with previous literature showing  
334 physiologically relevant, zero-lag relations (Engel et al., 1991; Contreras and Steriade, 1996; Roelfsema  
335 et al., 1997) in animals. Recently, a study using intracranial recordings showed interhemispheric zero-  
336 lag synchronization in the human brain (O'reilly and Elsabbagh, 2020). Most of the previous studies  
337 investigating synchrony between distant areas were focusing on gamma oscillations (>30 Hz) induced  
338 by specific tasks (Engel et al., 1991; Roelfsema et al., 1997; Womelsdorf et al., 2007; Siegel et al., 2008;  
339 Van Kerkoerle et al., 2014). These gamma oscillations were found to facilitate feedforward processing,  
340 while mid-frequencies were related to feedback effects from higher areas (Von Stein et al., 2000;  
341 Bosman et al., 2012; Van Kerkoerle et al., 2014). Given these differences in task-induced and resting-



342 state signals, it is plausible that the simultaneous fluctuations we describe here represent intrinsic  
343 synchrony during minimal sensory input. The finding of quasi zero-phase relations between distant  
344 areas might signify functional convergence in these regions during rest, in contrast to sensory-driven  
345 time-lagged oscillations induced by a specific task. In that sense, quasi zero-phase relations in  
346 distributed areas might relate to the representation and maintenance, rather than the processing of  
347 information. This long-range synchronization is briefly stable, not persistently, indicating flexible  
348 spatial reconfiguration pertaining to the establishment of particular, re-occurring states. Taken  
349 together, we suggest that the balance between temporal stability and spatial flexibility of long-range,  
350 simultaneous synchronization patterns is characteristic of the dynamic coordination of large-scale  
351 functional brain networks. As such, quasi zero-lag related EEG source fluctuations are physiologically  
352 meaningful if spatial leakage is considered appropriately, and should not be excluded in the analysis  
353 of functional connectivity using EEG/MEG source imaging.

354

## 355 References

- 356 Baker AP, Brookes MJ, Rezek IA, Smith SM, Behrens T, Smith PJP, Woolrich M (2014) Fast transient  
357 networks in spontaneous human brain activity. *Elife* 3:e01867.
- 358 Bosman CA, Schoffelen J-M, Brunet N, Oostenveld R, Bastos AM, Womelsdorf T, Rubehn B, Stieglitz T,  
359 De Weerd P, Fries P (2012) Attentional stimulus selection through selective synchronization  
360 between monkey visual areas. *Neuron* 75:875-888.
- 361 Brookes MJ, Woolrich M, Luckhoo H, Price D, Hale JR, Stephenson MC, Barnes GR, Smith SM, Morris  
362 PG (2011) Investigating the electrophysiological basis of resting state networks using  
363 magnetoencephalography. *Proceedings of the National Academy of Sciences* 108:16783-  
364 16788.
- 365 Brunet D, Murray MM, Michel CM (2011) Spatiotemporal analysis of multichannel EEG: CARTOOL.  
366 *Computational intelligence and neuroscience* 2011:2.
- 367 Cabral J, Vidaurre D, Marques P, Magalhães R, Moreira PS, Soares JM, Deco G, Sousa N, Kringelbach  
368 ML (2017) Cognitive performance in healthy older adults relates to spontaneous switching  
369 between states of functional connectivity during rest. *Scientific reports* 7:1-13.
- 370 Colclough GL, Brookes MJ, Smith SM, Woolrich MW (2015) A symmetric multivariate leakage  
371 correction for MEG connectomes. *Neuroimage* 117:439-448.
- 372 Contreras D, Steriade M (1996) Synchronization of low-frequency rhythms in corticothalamic  
373 networks. *Neuroscience* 76:11-24.
- 374 Deco G, Kringelbach ML (2016) Metastability and coherence: extending the communication through  
375 coherence hypothesis using a whole-brain computational perspective. *Trends in*  
376 *neurosciences* 39:125-135.
- 377 Deco G, Tononi G, Boly M, Kringelbach ML (2015) Rethinking segregation and integration:  
378 contributions of whole-brain modelling. *Nature Reviews Neuroscience* 16:430-439.
- 379 Destexhe A, Contreras D, Steriade M (1999) Spatiotemporal analysis of local field potentials and unit  
380 discharges in cat cerebral cortex during natural wake and sleep states. *Journal of Neuroscience*  
381 19:4595-4608.
- 382 Engel AK, König P, Kreiter AK, Singer W (1991) Interhemispheric synchronization of oscillatory  
383 neuronal responses in cat visual cortex. *Science*:1177-1179.
- 384 Engel AK, Gerloff C, Hilgetag CC, Nolte G (2013) Intrinsic coupling modes: multiscale interactions in  
385 ongoing brain activity. *Neuron* 80:867-886.
- 386 Fox KC, Foster BL, Kucyi A, Daitch AL, Parvizi J (2018) Intracranial electrophysiology of the human  
387 default network. *Trends in cognitive sciences* 22:307-324.
- 388 Fries P (2005) A mechanism for cognitive dynamics: neuronal communication through neuronal  
389 coherence. *Trends in cognitive sciences* 9:474-480.
- 390 Ghuman AS, McDaniel JR, Martin A (2011) A wavelet-based method for measuring the oscillatory  
391 dynamics of resting-state functional connectivity in MEG. *Neuroimage* 56:69-77.
- 392 Gollo LL, Mirasso C, Sporns O, Breakspear M (2014) Mechanisms of zero-lag synchronization in cortical  
393 motifs. *PLoS computational biology* 10:e1003548.
- 394 Grave de Peralta Menendez R, Murray MM, Michel CM, Martuzzi R, Gonzalez Andino SL (2004)  
395 Electrical neuroimaging based on biophysical constraints. *NeuroImage* 21:527-539.
- 396 Greicius MD, Krasnow B, Reiss AL, Menon V (2003) Functional connectivity in the resting brain: a  
397 network analysis of the default mode hypothesis. *Proceedings of the National Academy of*  
398 *Sciences* 100:253-258.
- 399 He B, Sohrabpour A, Brown E, Liu Z (2018) Electrophysiological Source Imaging: A Noninvasive Window  
400 to Brain Dynamics. *Annual Review of Biomedical Engineering* 20:171-196.
- 401 He B, Astolfi L, Valdes-Sosa PA, Marinazzo D, Palva S, Benar CG, Michel CM, Koenig T (2019)  
402 *Electrophysiological Brain Connectivity: Theory and Implementation*. *IEEE Transactions on*  
403 *Biomedical Engineering*.

- 404 Hipp JF, Engel AK, Siegel M (2011) Oscillatory synchronization in large-scale cortical networks predicts  
405 perception. *Neuron* 69:387-396.
- 406 Hipp JF, Hawellek DJ, Corbetta M, Siegel M, Engel AK (2012) Large-scale cortical correlation structure  
407 of spontaneous oscillatory activity. *Nature neuroscience* 15:884.
- 408 Ju H, Bassett DS (2020) Dynamic representations in networked neural systems. *Nature*  
409 *Neuroscience*:1-10.
- 410 Jung T-P, Makeig S, Humphries C, Lee T-W, Mckeown MJ, Iragui V, Sejnowski TJ (2000) Removing  
411 electroencephalographic artifacts by blind source separation. *Psychophysiology* 37:163-178.
- 412 Krishnaswamy P, Obregon-Henao G, Ahveninen J, Khan S, Babadi B, Iglesias JE, Hämäläinen MS,  
413 Purdon PL (2017) Sparsity enables estimation of both subcortical and cortical activity from  
414 MEG and EEG. *Proceedings of the National Academy of Sciences* 114:E10465-E10474.
- 415 Lachaux J-P, Lutz A, Rudrauf D, Cosmelli D, Le Van Quyen M, Martinerie J, Varela F (2002) Estimating  
416 the time-course of coherence between single-trial brain signals: an introduction to wavelet  
417 coherence. *Neurophysiologie Clinique/Clinical Neurophysiology* 32:157-174.
- 418 Lachaux JP, Rodriguez E, Martinerie J, Varela FJ (1999) Measuring phase synchrony in brain signals.  
419 *Human brain mapping* 8:194-208.
- 420 Marzetti L, Della Penna S, Snyder AZ, Pizzella V, Nolte G, de Pasquale F, Romani GL, Corbetta M (2013)  
421 Frequency specific interactions of MEG resting state activity within and across brain networks  
422 as revealed by the multivariate interaction measure. *Neuroimage* 79:172-183.
- 423 Michel CM, Murray MM (2012) Towards the utilization of EEG as a brain imaging tool. *Neuroimage*  
424 61:371-385.
- 425 Michel CM, Koenig T (2018) EEG microstates as a tool for studying the temporal dynamics of whole-  
426 brain neuronal networks: a review. *Neuroimage* 180:577-593.
- 427 Michel CM, Brunet D (2019) EEG Source Imaging: a practical review of the analysis steps. *Frontiers in*  
428 *neurology* 10.
- 429 Michel CM, Murray MM, Lantz G, Gonzalez S, Spinelli L, Grave de Peralta R (2004) EEG source imaging.  
430 *Clin Neurophysiol* 115:2195-2222.
- 431 Miller KJ, Weaver KE, Ojemann JG (2009) Direct electrophysiological measurement of human default  
432 network areas. *Proceedings of the National Academy of Sciences* 106:12174-12177.
- 433 Morlet J, Arens G, Fourgeau E, Giard D (1982) Wave propagation and sampling theory—Part II:  
434 Sampling theory and complex waves. *Geophysics* 47:222-236.
- 435 Nolte G, Bai O, Wheaton L, Mari Z, Vorbach S, Hallett M (2004) Identifying true brain interaction from  
436 EEG data using the imaginary part of coherency. *Clinical neurophysiology* 115:2292-2307.
- 437 O'reilly C, Elsabbagh M (2020) Intracranial recordings reveal ubiquitous in-phase and in-antiphase  
438 functional connectivity between homologous brain regions in humans. *BioRxiv*.
- 439 Palva JM, Wang SH, Palva S, Zhigalov A, Monto S, Brookes MJ, Schoffelen J-M, Jerbi K (2018) Ghost  
440 interactions in MEG/EEG source space: A note of caution on inter-areal coupling measures.  
441 *Neuroimage* 173:632-643.
- 442 Palva S, Palva JM (2012) Discovering oscillatory interaction networks with M/EEG: challenges and  
443 breakthroughs. *Trends in cognitive sciences* 16:219-230.
- 444 Raichle ME (2010) Two views of brain function. *Trends in Cognitive Sciences* 14:180-190.
- 445 Raichle ME, MacLeod AM, Snyder AZ, Powers WJ, Gusnard DA, Shulman GL (2001) A default mode of  
446 brain function. *Proceedings of the National Academy of Sciences* 98:676-682.
- 447 Roelfsema PR, Engel AK, König P, Singer W (1997) Visuomotor integration is associated with zero time-  
448 lag synchronization among cortical areas. *Nature* 385:157.
- 449 Rubega M, Carboni M, Seeber M, Pascucci D, Tourbier S, Toscano G, Van Mierlo P, Hagmann P, Plomp  
450 G, Vulliemoz S, Michel CM (2018) Estimating EEG Source Dipole Orientation Based on Singular-  
451 value Decomposition for Connectivity Analysis. *Brain Topography* 32:704-719.
- 452 Samogin J, Liu Q, Marino M, Wenderoth N, Mantini D (2019) Shared and connection-specific intrinsic  
453 interactions in the default mode network. *Neuroimage* 200:474-481.

- 454 Schaefer A, Kong R, Gordon EM, Laumann TO, Zuo X-N, Holmes AJ, Eickhoff SB, Yeo BT (2017) Local-  
455 global parcellation of the human cerebral cortex from intrinsic functional connectivity MRI.  
456 *Cerebral Cortex* 28:3095-3114.
- 457 Seeber M, Cantonas LM, Hoevels M, Sesia T, Visser-Vandewalle V, Michel CM (2019) Subcortical  
458 electrophysiological activity is detectable with high-density EEG source imaging. *Nat Commun*  
459 10:753.
- 460 Seeley WW, Menon V, Schatzberg AF, Keller J, Glover GH, Kenna H, Reiss AL, Greicius MD (2007)  
461 Dissociable Intrinsic Connectivity Networks for Salience Processing and Executive Control.  
462 *Journal of Neuroscience* 27:2349-2356.
- 463 Siegel M, Donner TH, Oostenveld R, Fries P, Engel AK (2008) Neuronal synchronization along the dorsal  
464 visual pathway reflects the focus of spatial attention. *Neuron* 60:709-719.
- 465 Singer W (1999) Neuronal synchrony: a versatile code for the definition of relations? *Neuron* 24:49-  
466 65.
- 467 Smith SM, Fox PT, Miller KL, Glahn DC, Fox PM, Mackay CE, Filippini N, Watkins KE, Toro R, Laird AR  
468 (2009) Correspondence of the brain's functional architecture during activation and rest.  
469 *Proceedings of the National Academy of Sciences* 106:13040-13045.
- 470 Stam CJ, Nolte G, Daffertshofer A (2007) Phase lag index: assessment of functional connectivity from  
471 multi channel EEG and MEG with diminished bias from common sources. *Human brain*  
472 *mapping* 28:1178-1193.
- 473 Tagliazucchi E, Balenzuela P, Fraiman D, Chialvo DR (2012) Criticality in Large-Scale Brain fMRI  
474 Dynamics Unveiled by a Novel Point Process Analysis. *Frontiers in Physiology* 3.
- 475 Tognoli E, Kelso JS (2014) The metastable brain. *Neuron* 81:35-48.
- 476 Tononi G, Edelman GM (1998) Consciousness and complexity. *science* 282:1846-1851.
- 477 Van Kerkoerle T, Self MW, Dagnino B, Gariel-Mathis M-A, Poort J, Van Der Togt C, Roelfsema PR (2014)  
478 Alpha and gamma oscillations characterize feedback and feedforward processing in monkey  
479 visual cortex. *Proceedings of the National Academy of Sciences* 111:14332-14341.
- 480 Varela F, Lachaux J-P, Rodriguez E, Martinerie J (2001) The brainweb: phase synchronization and large-  
481 scale integration. *Nature reviews neuroscience* 2:229.
- 482 Vicente R, Gollo LL, Mirasso CR, Fischer I, Pipa G (2008) Dynamical relaying can yield zero time lag  
483 neuronal synchrony despite long conduction delays. *Proceedings of the National Academy of*  
484 *Sciences* 105:17157-17162.
- 485 Vidaurre D, Hunt LT, Quinn AJ, Hunt BA, Brookes MJ, Nobre AC, Woolrich MW (2018) Spontaneous  
486 cortical activity transiently organises into frequency specific phase-coupling networks. *Nat*  
487 *Commun* 9:2987.
- 488 Von Stein A, Chiang C, König P (2000) Top-down processing mediated by interareal synchronization.  
489 *Proceedings of the National Academy of Sciences* 97:14748-14753.
- 490 Womelsdorf T, Schoffelen J-M, Oostenveld R, Singer W, Desimone R, Engel AK, Fries P (2007)  
491 Modulation of neuronal interactions through neuronal synchronization. *science* 316:1609-  
492 1612.
